# Supplementary material
Source: publisher figshare collection journal article supplement (https://asha.figshare.com/articles/dataset/_/24121287)
Supplement: Supplementary file 1 [file 1]

## Supplemental Material S6. Baseline regression models.

Baseline regression models, that is only including the covariates (age, sex, IQ, and SES), for the DLD and TD group with for both latent language variables and the latent EF factor.

|                     |                 | DLD      |             |         |          | TD       |             |         |          |
|---------------------|-----------------|----------|-------------|---------|----------|----------|-------------|---------|----------|
|                     |                 | <i>B</i> | <i>SE B</i> | $\beta$ | <i>p</i> | <i>B</i> | <i>SE B</i> | $\beta$ | <i>p</i> |
| <b>Morphosyntax</b> | <i>Step 1</i>   |          |             |         |          |          |             |         |          |
|                     | <i>Constant</i> | -3.926   | .649        |         | .000     | -3.554   | .594        |         | .000     |
|                     | <i>Age</i>      | 0.490    | .085        | .664    | < .001*  | 0.607    | .066        | .713    | < .001*  |
|                     | <i>Sex</i>      | -0.199   | .143        | -.162   | .17      | -0.187   | .119        | -.122   | .12      |
|                     | <i>IQ</i>       | 0.007    | .005        | .171    | .13      | 0.007    | .004        | .124    | .11      |
|                     | <i>SES</i>      | 0.067    | .036        | .202    | .072     | 0.114    | .045        | .200    | .014*    |
| <b>Vocabulary</b>   | <i>Step 1</i>   |          |             |         |          |          |             |         |          |
|                     | <i>Constant</i> | -5.666   | .743        |         | .000     | -5.604   | .601        |         | .000     |
|                     | <i>Age</i>      | 0.869    | .098        | .814    | < .001*  | 0.834    | .067        | .795    | < .001*  |
|                     | <i>Sex</i>      | -0.064   | .163        | -.036   | .70      | -0.155   | .120        | -.082   | .20      |
|                     | <i>IQ</i>       | 0.008    | .005        | .138    | .12      | 0.015    | .005        | .207    | .002*    |
|                     | <i>SES</i>      | 0.056    | .042        | .116    | .19      | 0.095    | .046        | .134    | .042*    |

*Note.* B = unstandardized regression coefficient;  $\beta$  = standardized regression coefficient; DLD = developmental language disorder; EF = executive functioning (latent factor); IQ = intelligence quotient; *SE* = standard error; SES = socioeconomic status; TD = typically developing. Significant outcomes in bold and \*  $p < .05$ .
