# Supplementary material
Source: publisher figshare collection journal article supplement (https://asha.figshare.com/articles/dataset/_/24121287)
Supplement: Supplementary file 2 [file 1]

**Supplemental Material S3.** Correlations between the EF tasks.

Partial correlations controlling for age between the nonverbal EF tasks for both groups.

|           | <i>1. SA</i>                 | <i>2. Corsi FW</i>           | <i>3. Corsi BW</i>           | <i>4. HTKS</i>              |
|-----------|------------------------------|------------------------------|------------------------------|-----------------------------|
| <i>1.</i> | -                            | $r(72) = .16,$<br>$p = .18$  | $r(71) = .04,$<br>$p = .76$  | $r(61) = .14,$<br>$p = .28$ |
| <i>2.</i> | $r(54) = .35,$<br>$p = .009$ | -                            | $r(71) = .32,$<br>$p = .006$ | $r(60) = .16,$<br>$p = .23$ |
| <i>3.</i> | $r(52) = .01,$<br>$p = .96$  | $r(52) = .35,$<br>$p = .010$ | -                            | $r(60) = .06,$<br>$p = .65$ |
| <i>4.</i> | $r(34) = .22,$<br>$p = .20$  | $r(32) = .32,$<br>$p = .064$ | $r(31) = .34,$<br>$p = .051$ | -                           |

*Note.* BW = backward; FW = forward; HTKS = head-toes-knees-shoulders task; SA = selective attention. DLD group below the diagonal, TD group above the diagonal. Significant correlations in bold. All Pearson correlations (without partialing out age) are significant in both groups.
