# Supplementary material
Source: publisher figshare collection journal article supplement (https://asha.figshare.com/articles/dataset/_/24121287)
Supplement: Supplementary file 3 [file 1]

**Supplemental Material S4.** Correlations of the latent factors with demographic variables.

Correlations with demographic variables for the groups separately and as a whole.

|                     |            | Age      |            |                  | SES      |            |                         | IQ       |            |                         |
|---------------------|------------|----------|------------|------------------|----------|------------|-------------------------|----------|------------|-------------------------|
|                     |            | <i>n</i> | <i>r</i>   | <i>p</i>         | <i>n</i> | <i>r</i>   | <i>p</i>                | <i>n</i> | <i>r</i>   | <i>p</i>                |
| <b>Morphosyntax</b> | <i>All</i> | 141      | <b>.45</b> | <b>&lt; .001</b> | 138      | <b>.47</b> | <b>&lt; .001</b>        | 140      | <b>.35</b> | <b>&lt; .001</b>        |
|                     | <i>TD</i>  | 77       | <b>.75</b> | <b>&lt; .001</b> | 76       | <b>.27</b> | <b>.017<sup>a</sup></b> | 76       | .18        | .12 <sup>a</sup>        |
|                     | <i>DLD</i> | 64       | <b>.65</b> | <b>&lt; .001</b> | 62       | .15        | .24                     | 64       | .17        | .17                     |
| <b>Vocabulary</b>   | <i>All</i> | 141      | <b>.72</b> | <b>&lt; .001</b> | 138      | <b>.29</b> | <b>&lt; .001</b>        | 140      | <b>.32</b> | <b>&lt; .001</b>        |
|                     | <i>TD</i>  | 78       | <b>.83</b> | <b>&lt; .001</b> | 77       | <b>.25</b> | <b>.028<sup>a</sup></b> | 77       | <b>.25</b> | <b>.028</b>             |
|                     | <i>DLD</i> | 63       | <b>.82</b> | <b>&lt; .001</b> | 61       | -.00       | .97                     | 63       | .17        | .18                     |
| <b>EF</b>           | <i>All</i> | 129      | <b>.68</b> | <b>&lt; .001</b> | 127      | <b>.22</b> | <b>.012</b>             | 129      | <b>.33</b> | <b>&lt; .001</b>        |
|                     | <i>TD</i>  | 74       | <b>.78</b> | <b>&lt; .001</b> | 73       | .11        | .35                     | 74       | <b>.26</b> | <b>.024</b>             |
|                     | <i>DLD</i> | 55       | <b>.68</b> | <b>&lt; .001</b> | 54       | .11        | .41                     | 55       | <b>.28</b> | <b>.038<sup>a</sup></b> |

*Note.* DLD = developmental language disorder; EF = executive functioning; IQ = intelligence quotient; SES = socioeconomic status; TD = typically developing. Significant outcomes in bold.

<sup>a</sup>Spearman's Rho as these nonparametric outcomes differed from the Pearson correlation. Pearson correlations were as follows: TD Morphosyntax-SES:  $r(76) = .19, p = .094$ ; TD Vocabulary-SES:  $r(77) = .16, p = .18$ ; TD Morphosyntax-IQ:  $r(76) = .24, p = .04$ ; DLD EF-IQ:  $r(55) = .21, p = .13$ .
