# Supplementary material
Source: publisher figshare collection journal article supplement (https://asha.figshare.com/articles/dataset/_/24121287)
Supplement: Supplementary file 4 [file 1]

**Supplemental Material S1.** Group comparison on raw and norm scores of each language measure separately.

Group comparison on raw and norm scores of language tasks with ANCOVAs while controlling for age, sex, IQ, and SES.

|                  | <b>DLD</b> |          |           | <b>TD</b> |          |           |                                                         |
|------------------|------------|----------|-----------|-----------|----------|-----------|---------------------------------------------------------|
|                  | <i>N</i>   | <i>M</i> | <i>SD</i> | <i>N</i>  | <i>M</i> | <i>SD</i> |                                                         |
| <b>WS raw</b>    | 62         | 8.8      | 4.2       | 76        | 16.6     | 4.2       | $F(1, 132) = 104.97$ ,<br>$p < .001$ , $\eta_p^2 = .44$ |
| <b>RS raw</b>    | 62         | 6.5      | 3.7       | 75        | 19.9     | 8.1       | $F(1, 131) = 136.42$ ,<br>$p < .001$ , $\eta_p^2 = .51$ |
| <b>EV raw</b>    | 61         | 18.8     | 7.5       | 76        | 26.9     | 6.9       | $F(1, 131) = 49.43$ ,<br>$p < .001$ , $\eta_p^2 = .27$  |
| <b>PPVT raw</b>  | 63         | 62.7     | 13.6      | 76        | 71.7     | 15.8      | $F(1, 133) = 13.27$ ,<br>$p < .001$ , $\eta_p^2 = .09$  |
| <b>WS norm</b>   | 62         | 4.4      | 2.5       | 76        | 10.9     | 2.9       | $F(1, 132) = 88.08$ ,<br>$p < .001$ , $\eta_p^2 = .40$  |
| <b>RS norm</b>   | 62         | 4.6      | 1.7       | 75        | 10.0     | 2.4       | $F(1, 131) = 130.20$ ,<br>$p < .001$ , $\eta_p^2 = .50$ |
| <b>EV norm</b>   | 61         | 6.2      | 2.4       | 76        | 10.6     | 2.4       | $F(1, 132) = 52.70$ ,<br>$p < .001$ , $\eta_p^2 = .29$  |
| <b>PPVT norm</b> | 63         | 95.8     | 10.4      | 76        | 109.0    | 11.7      | $F(1, 133) = 13.01$ ,<br>$p < .001$ , $\eta_p^2 = .09$  |

*Note.* DLD = developmental language disorder; EV = expressive vocabulary; *SD* = standard deviation; PPVT = Peabody Picture Vocabulary Test; RS = recalling sentences; TD = typically developing; WS = word structure. Raw scores of the tests can range as follows: WS: 0-23, RS: 0-39, EV: 0-40, PPVT: 0-204. The norm scores of the CELF subtests (WS, RS, EV) can range from 1-19 with a mean of 10 and an *SD* of 3 and the PPVT norm scores can range from 55-145 with a mean of 100 and an *SD* of 15.

For 11 children with DLD the PPVT had been administered by their speech-language therapist (SLT) in the three months prior to testing. In these cases, we received the PPVT assessment from their SLT. For all other children with DLD PPVT assessment had been conducted more than three months before study participation, and we administered the PPVT ourselves. For two of the children whose SLT administered the PPVT, the CELF Preschool was also administered by their SLT. The CELF assessments of these children took place within two weeks around the EF assessment for the current study.
