# Supplementary material
Source: publisher figshare collection journal article supplement (https://asha.figshare.com/articles/dataset/_/24121287)
Supplement: Supplementary file 5 [file 1]

**Supplemental Material S5.** Comparison of demographic variables of children who completed the HTKS and those who did not for both groups.

Group comparison of demographic variables between children with complete data and children with incomplete data for the Broad EF task for both the DLD and TD group.

|            |            | HTKS complete        |           | HTKS missing        |           |                                                             |
|------------|------------|----------------------|-----------|---------------------|-----------|-------------------------------------------------------------|
|            |            | <i>M</i>             | <i>SD</i> | <i>M</i>            | <i>SD</i> |                                                             |
| <b>Age</b> | <i>DLD</i> | 5.25                 | 0.5       | 4.1                 | 0.7       | <b><math>t(63) = 7.26, p &lt; .001, g = 1.82</math></b>     |
|            | <i>TD</i>  | 4.9                  | 0.8       | 3.4                 | 0.2       | <b><math>t(71.40) = 13.78, p &lt; .001, d = 2.18</math></b> |
| <b>Sex</b> | <i>DLD</i> | <i>n</i> f/m = 5/32  |           | <i>n</i> f/m = 8/20 |           | $\chi^2(1) = 2.26, p = .13, V = .19$                        |
|            | <i>TD</i>  | <i>n</i> f/m = 36/28 |           | <i>n</i> f/m = 8/6  |           | $\chi^2(1) = .00, p = .95, V = .01$                         |
| <b>IQ</b>  | <i>DLD</i> | 97.6                 | 12.4      | 97.9                | 13.9      | $t(63) = -.09, p = .93, g = .02$                            |
|            | <i>TD</i>  | 106.6                | 12.2      | 105.5               | 17.0      | $t(75) = .268, p = .80, g = .08$                            |
| <b>SES</b> | <i>DLD</i> | 6.3                  | 1.6       | 6.3                 | 1.6       | $t(61) = -.07, p = .95, g = .01$                            |
|            | <i>TD</i>  | 7.9                  | 1.3       | 7.6                 | 1.6       | $t(75) = .85, p = .40, g = .26$                             |
| <b>CLI</b> | <i>DLD</i> | 76.9                 | 13.2      | 76.8                | 11.6      | $t(61) = .03, p = .98, g = .01$                             |
|            | <i>TD</i>  | 106.3                | 12.9      | 106.6               | 12.8      | $t(76) = -.095, p = .92, g = .02$                           |

*Note.* CLI = CELF Core Language Index; DLD = developmental language disorder; IQ = intelligence quotient; *SD* = standard deviation; SES = socioeconomic status; TD = typically developing. Significant outcomes in bold.
