# Supplementary material
Source: publisher figshare collection journal article supplement (https://asha.figshare.com/articles/dataset/_/24121287)
Supplement: Supplementary file 6 [file 1]

**Supplemental Material S2.** Correlations between the latent language factors and the separate EF tasks and the latent EF factor.

Partial correlations controlling for age between both latent language factors and each EF tasks per group.

|                  |            | Morphosyntax |            |                  | Vocabulary |            |                  |
|------------------|------------|--------------|------------|------------------|------------|------------|------------------|
|                  |            | <i>n</i>     | <i>r</i>   | <i>p</i>         | <i>n</i>   | <i>r</i>   | <i>p</i>         |
| <b>SA</b>        | <i>DLD</i> | <b>61</b>    | <b>.28</b> | <b>.024</b>      | <b>60</b>  | <b>.41</b> | <b>.001</b>      |
|                  | <i>TD</i>  | <b>74</b>    | <b>.24</b> | <b>.040</b>      | <b>75</b>  | <b>.27</b> | <b>.020</b>      |
| <b>Corsi FW</b>  | <i>DLD</i> | 53           | .22        | .10              | 53         | .15        | .28              |
|                  | <i>TD</i>  | 71           | .03        | .81              | 72         | .09        | .43              |
| <b>Corsi BW</b>  | <i>DLD</i> | <b>51</b>    | <b>.30</b> | <b>.032</b>      | 51         | .17        | .22              |
|                  | <i>TD</i>  | <b>71</b>    | <b>.27</b> | <b>.021</b>      | 71         | .23        | .053             |
| <b>HTKS</b>      | <i>DLD</i> | <b>33</b>    | <b>.48</b> | <b>.004</b>      | <b>32</b>  | <b>.40</b> | <b>.018</b>      |
|                  | <i>TD</i>  | 61           | .02        | .89              | 61         | .17        | .18              |
| <b>Latent EF</b> | <i>All</i> | 128          | <b>.52</b> | <b>&lt; .001</b> | 125        | <b>.53</b> | <b>&lt; .001</b> |
|                  | <i>DLD</i> | 51           | <b>.33</b> | <b>.017</b>      | 51         | <b>.36</b> | <b>.008</b>      |
|                  | <i>TD</i>  | 71           | <b>.31</b> | <b>.007</b>      | 71         | <b>.33</b> | <b>.004</b>      |

*Note.* BW = backward; DLD = developmental language disorder; FW = forward; HTKS = head-toes-knees-shoulders task; SA = selective attention; TD = typically developing. Significant results in bold.
